# Supplementary material
Source: PubMed Central journal article supplement (PMC7774254)
Supplement: ao0c04745_si_001.pdf [file ao0c04745_si_001.pdf]

## Supporting Information

### **Metabolomic elucidation of the effect of sucrose on the secondary metabolite profiles in *Melissa officinalis* by ultra-performance liquid chromatography-mass spectrometry**

Sooah Kim<sup>†</sup>, Jungyeon Kim<sup>‡</sup>, Nahyun Kim<sup>§, ⊥</sup>, Dongho Lee<sup>§</sup>, Hojoung Lee<sup>§</sup>, Dong-Yup Lee<sup>||, \*\*, \*</sup>,  
Kyoung Heon Kim<sup>‡, \*</sup>

<sup>†</sup>*Department of Environment Science and Biotechnology, Jeonju University, Jeonju 55069, South Korea*

<sup>‡</sup>*Department of Biotechnology, Graduate School, Korea University, Seoul 02841, South Korea*

<sup>§</sup>*College of Life Sciences and Biotechnology, Korea University, Seoul 02841, South Korea*

<sup>||</sup> *School of Chemical Engineering, Sungkyunkwan University, Suwon 25308, South Korea*

Corresponding authors

\* *E-mail address:* khekim@korea.ac.kr (K. H. Kim); Tel.: +82-2-3290-3028

\*\* *E-mail address:* dongyuplee@skku.edu (D.-Y. Lee)

<sup>⊥</sup> *Current affiliation: Forest Medicinal Resources Research Center, National Institute of Forest Science, Yongju 36040, South Korea*

## Contents

**Figure S1.** Chromatograms for the same sample before (A) and after (B) removal of lock spray scans as examples.

**Figure S2.** Validation of the PLS-DA model using the 100 permutation test. The Y-intercept of  $R^2$  and  $Q^2$  indicate 0.719 and -0.248, respectively.

**Table S1.** Number of peaks detected, peak-groups, IP-clusters, and predictions in negative and positive modes.

(A)

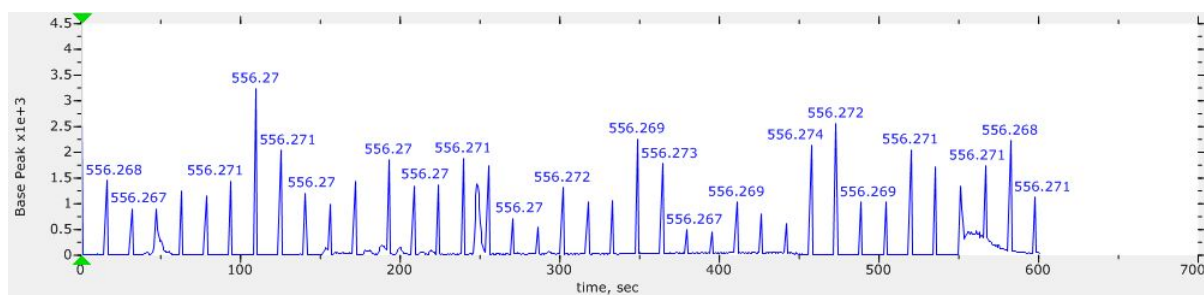

(B)

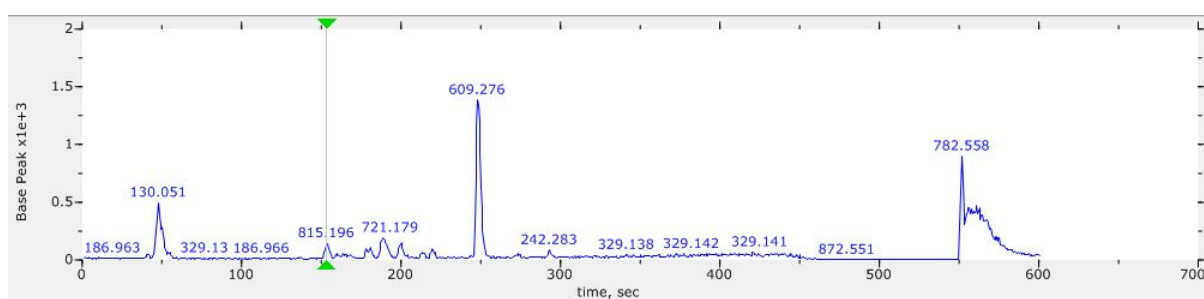

**Figure S1.** Chromatograms for the same sample before (A) and after (B) removal of lock spray scans as examples.

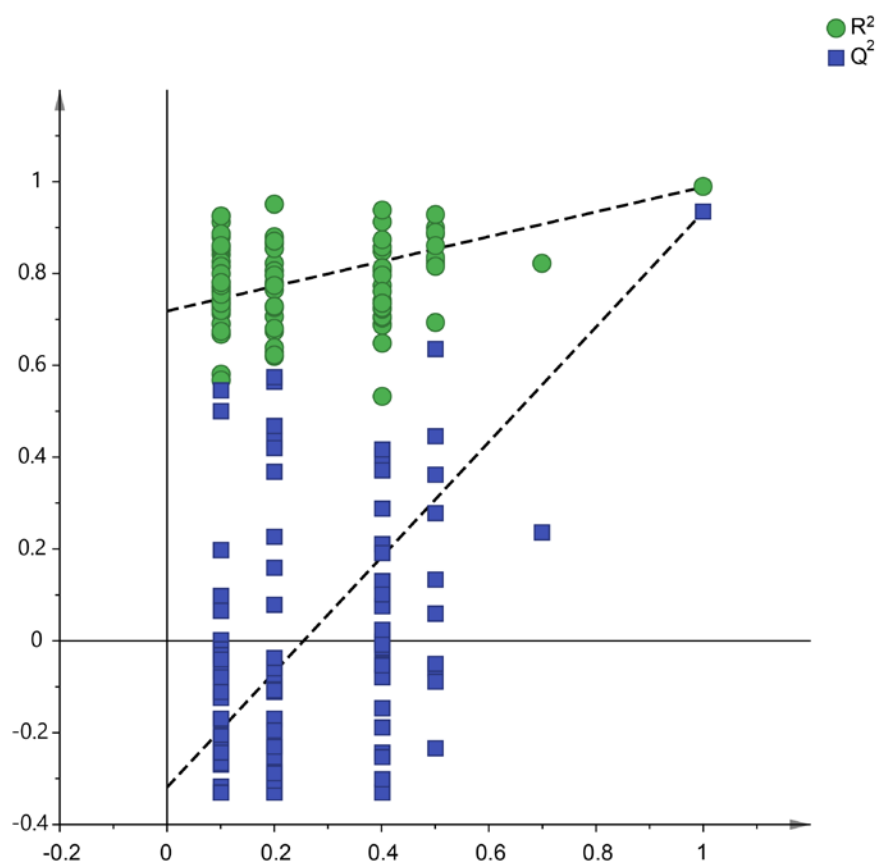

**Figure S2.** Validation of the PLS-DA model using the 100 permutation test. The Y-intercept of  $R^2$  and  $Q^2$  indicate 0.719 and -0.248, respectively.

**Table S1.** Number of peaks detected, peak-groups, IP-clusters, and predictions in negative and positive modes.

| Feature                         | Negative | Positive |
|---------------------------------|----------|----------|
| Peaks detected                  | 21754    | 11705    |
| Peak-groups with minimum SNR >2 | 736      | 376      |
| IP-Clusters                     | 515      | 251      |
| Predictions                     | 613      | 286      |
